# Supplementary material for: An in situ ratiometric fluorescence immunosensor via Mn2+-triggered aggregation-induced emission transformation of levodopa fluorescent copolymer nanoparticles
Source: Royal Society of Chemistry journal article supplement (doi:10.1039/d4ay00973h), 2024-01-01
Supplement: d4ay00973h1.pdf [file d4ay00973h1.pdf]

1 **Mn<sup>2+</sup>-triggered an in situ ratiometric fluorescence**  
2 **immunosensor via rapidly aggregation-induced emission**  
3 **transformation of levodopa fluorescent copolymer**  
4 **nanoparticles**

5 Yifei Ma, Xiaoxue Liu, Naidi Yang, Changpeng Zou, Yujie Sun, Guichuan Xing,

6 Jinhua Liu \*, Zhihui Xu\*, Fenghua Geng \*

7

8

9

10

11

12

13

14

15

16

17

18

19

20

21

22

23

24

25

26

27

28

29

30

31

32

33

34

35

36

37

38

## 1 **1. Experimental section**

### 2 **1.1 Materials and reagents.**

3 Alkaline Phosphatase (ALP, specific activity = 5000 U/mg Protein), Trypsin,  
4 Pyrophosphatase (PPase), Tyrosinase (TYR), Bovine serum albumin (BSA), Glucose  
5 oxidase (GOD), Pepsin, COD, Levodopa, Ethylenediamine (EDA),  $\text{MnCl}_2$ ,  $\text{Na}_5\text{P}_3\text{O}_{10}$ ,  
6 Ethylenediaminetetraacetic acid (EDTA) and other reagents were purchased from  
7 Aladdin reagent Co., Ltd. (Shanghai, China). Human blood samples were purchased  
8 from Youqing Biological Reagent Co., Ltd. (Nanjing, China). All chemicals were of  
9 analytical reagent grade and used without further purification.

### 10 **1.2 Apparatus.**

11 A UV-Vis spectrophotometer (UV-1750, SHIMADZU, Japan) was applied to  
12 record the UV-Vis absorption spectra. An F-7000 fluorescence spectrophotometer  
13 (HITACHI, Japan) was adopted to record the fluorescence spectra with a standard  
14  $10 \times 10$  mm quartz cell and a xenon lamp as the excitation source. Ultrapure water (18.2  
15  $\text{M}\Omega$ ) was acquired utilizing a Milli-Q Advantage A10 purification system (Millipore  
16 S.A, Bedford, USA). Transmission electron microscopy (TEM) images were obtained  
17 using a JEM-2010 UHR transmission electron microscopy (JEOL, Japan). Photos were  
18 taken by a Canon PowerShot SX50 digital camera (Japan).

### 19 **1.3 Synthesis of levodopa fluorescent copolymer (LFC).**

20 LFC was prepared according to room temperature-aqueous synthesis. The  
21 synthesis process was as follows: 4  $\mu\text{L}$  levodopa (10 mM) and 2  $\mu\text{L}$  EDA (10 g/mL)  
22 were added into 400  $\mu\text{L}$  Tris-HCl buffer (10 mM, pH = 7.4). After mixing thoroughly,

1 the fluorescence intensity of LFC was checked after mixing for 15 min at room  
2 temperature.

### 3 **1.4 Sensing Mn<sup>2+</sup>.**

4 80 µL levodopa (10 mM) and 40 µL EDA (10 g/mL) were added into 8 mL Tris-  
5 HCl buffer (10 mM, pH = 7.4) to obtain LFC. After mixing thoroughly, Mn<sup>2+</sup> aqueous  
6 solution with different concentrations was added to 400 µL LFC solution, respectively.  
7 The fluorescence intensity of LFC was checked after mixing for 15 min at room  
8 temperature. To evaluate the selectivity of this method for Mn<sup>2+</sup>, The common metal  
9 ions (Ag<sup>+</sup>, Zn<sup>2+</sup>, Cr<sup>3+</sup>, Ca<sup>2+</sup>, Cd<sup>2+</sup>, Co<sup>2+</sup>, Al<sup>3+</sup>, Ni<sup>2+</sup>, Mg<sup>2+</sup>, Ba<sup>2+</sup>, K<sup>+</sup>, Fe<sup>2+</sup>, Fe<sup>3+</sup>, Pd<sup>2+</sup>,  
10 Hg<sup>2+</sup>, Cu<sup>2+</sup>) and various anions in water (CO<sub>3</sub><sup>2-</sup>, SO<sub>4</sub><sup>2-</sup>, HCO<sub>3</sub><sup>-</sup>, Cl<sup>-</sup>, OH<sup>-</sup>) were  
11 investigated under the same conditions. The concentration of all ions was 2 µM.

### 12 **1.5 Sensing ALP.**

13 Different concentrations of the ALP were joined to 40 µL P<sub>3</sub>O<sub>10</sub><sup>5-</sup> (500 µM)  
14 solution in Tris-HCl buffer (pH = 9.0) at 37 °C for 30 min. Then the volume of 40 µL  
15 ALP/ P<sub>3</sub>O<sub>10</sub><sup>5-</sup> mix solution was added to the LFC/Mn<sup>2+</sup> system. After incubation for  
16 15 min, the fluorescence intensity of LFC was recorded. To assess the selectivity of the  
17 assay to ALP, a series of competitive enzymes or proteins, including Trypsin, PPase,  
18 TYR, BSA, GOD, Pepsin, and COD were investigated under the same condition. The  
19 concentration of all substances was 200 mU/mL.

### 20 **1.6 Sensing of cTnI.**

21 The immunoassay was performed as follows. Firstly, 100 µL of diluted mouse  
22 monoclonal antibody (1 µg/mL) in coating solution was injected into the wells of a 96-

1 well polystyrene plate and incubated at 4 °C overnight. After removing the solutions,  
2 the plate was washed four times with 200 µL of wash buffer (TBST), and blocked with  
3 2% BSA at 37 °C for 1 h to reduce nonspecific binding. After washing again, 100 µL  
4 of cTnI standard solutions with different concentrations ranging from 0 to 125 ng/mL  
5 were injected into each well and incubated at 37 °C for 1 h, followed by washing  
6 procedures. Second, 100 µL of goat-cTnI antibody (2 µg/mL, 100 µL) was injected and  
7 incubated at 37 °C for 1 h. Third, the wells were washed four times and 100 µL of  
8 donkey goat secondary antibody labeled with ALP (1.5 µg/mL) was added and  
9 subsequently incubated at 37 °C for 1 h. After washing the plates, 40 µL  $P_3O_{10}^{5-}$  (500  
10 µM) and 160 µL Tris-HCl (10 mM, pH 9.0) buffers were injected into each well,  
11 incubated at 37°C for 30 min, then the alp coupled second antibody was removed and  
12 washed four times. Afterward, 400 µL of Tris-HCl (10 mM, pH 7.4), 4 µL levodopa  
13 (10 mM), 2 µL EDA (10 g/mL) and  $Mn^{2+}$  (200 nM) were added into each well of the  
14 plates, and the real-time fluorescence curves of the resultant solutions were directly  
15 recorded.  
16

1 2. Data Chart Supplement

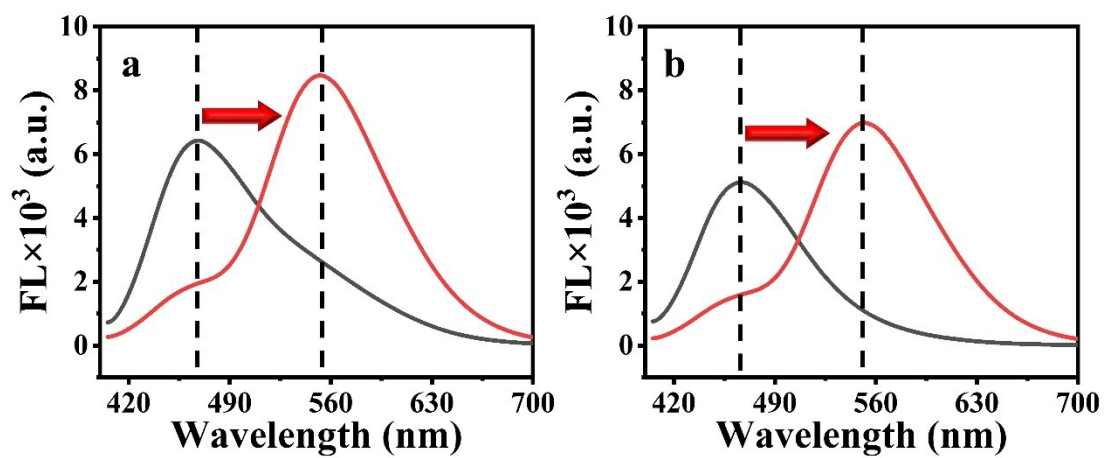

2

3 **Fig. S1.** Luminescence spectra of LFC nanoparticles and LFC nanoparticles -Mn<sup>2+</sup>

4 before (a) and after (b) dialysis.

5

6

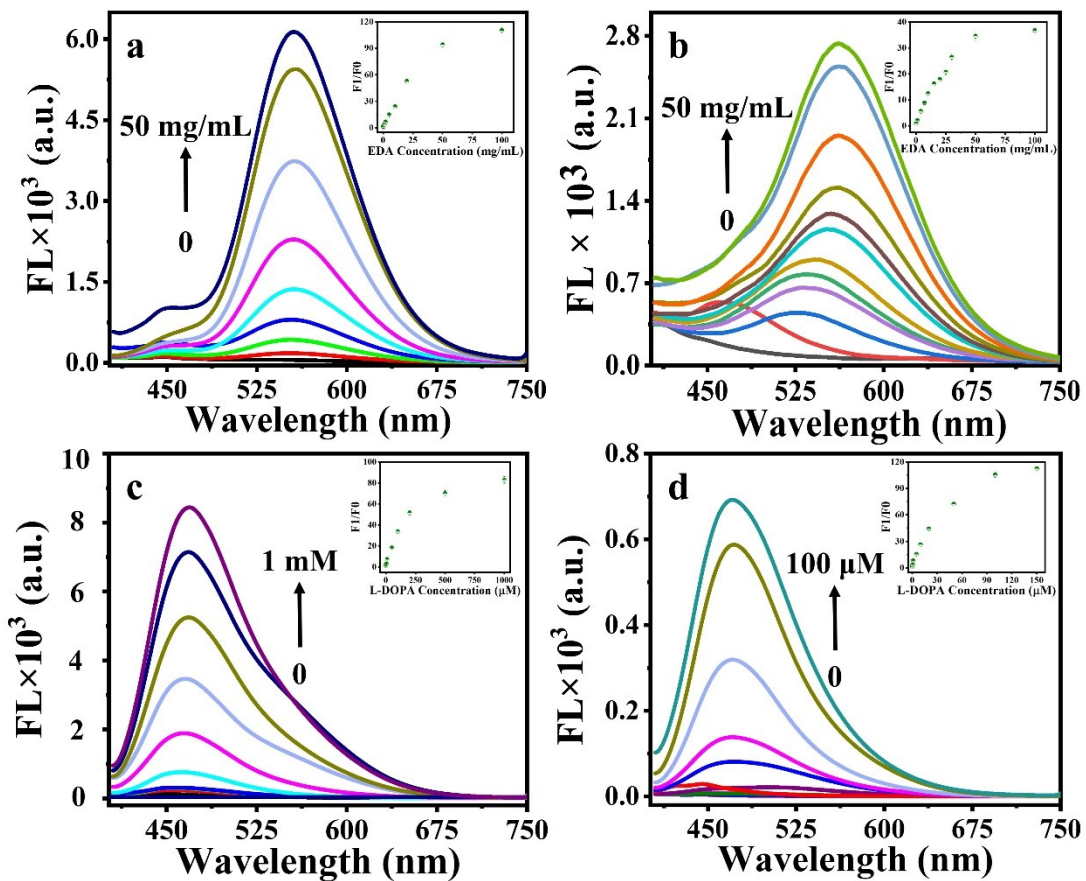

1

2 **Fig. S2.** Variations in luminescence intensity of LFC nanoparticles and LFC

3 nanoparticles -Mn<sup>2+</sup> with the change of concentration of EDA (a, b) and L-DOPA (c,

4 d) at 385 nm excitation. Inset: Relationship between  $F/F_0$  and the EDA/L-DOPA

5 concentration.

6

7

8

9

10

11

12

13

14

15

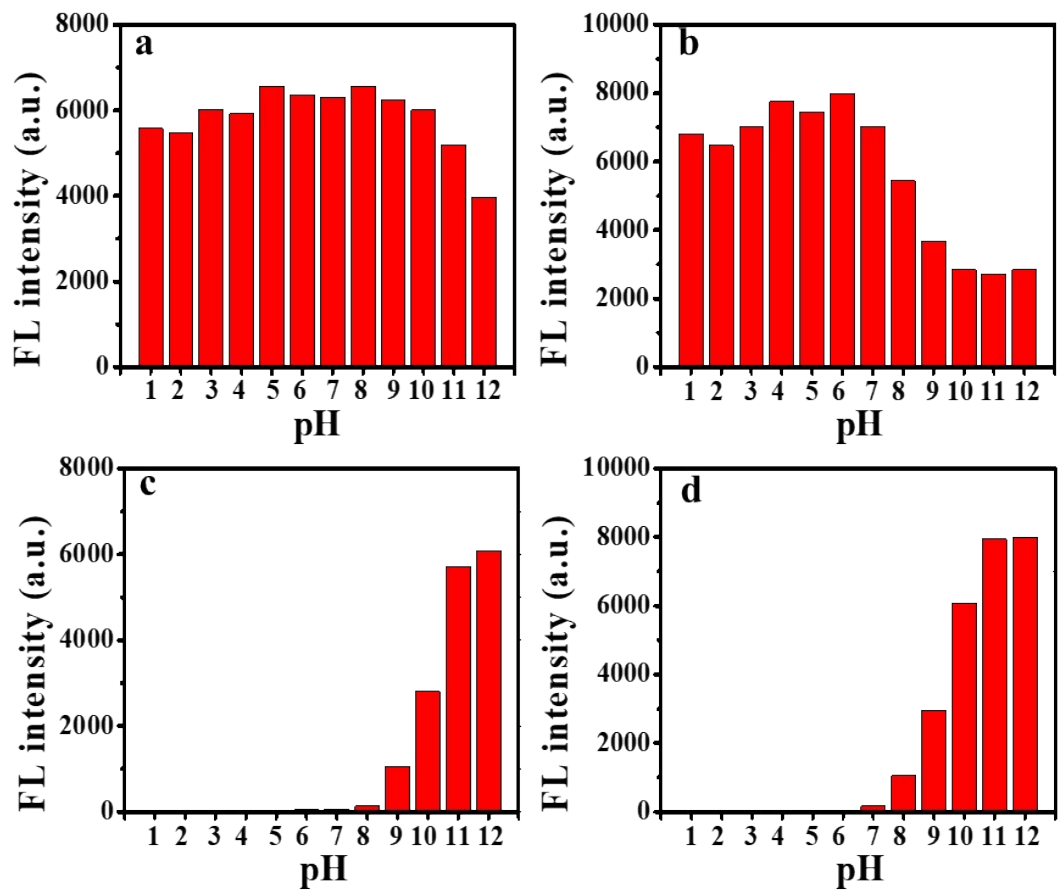

1

2 **Fig. S3.** The influence on the luminescence intensity of LFC nanoparticles with the pH  
 3 change of Tris-HCl buffer (a) and EDA (c); The influence on the luminescence intensity  
 4 of LFC nanoparticles -Mn<sup>2+</sup> with the pH change of Tris-HCl buffer (b) and EDA (d).

5

6

7

8

9

10

11

12

13

14

15

16

17

18

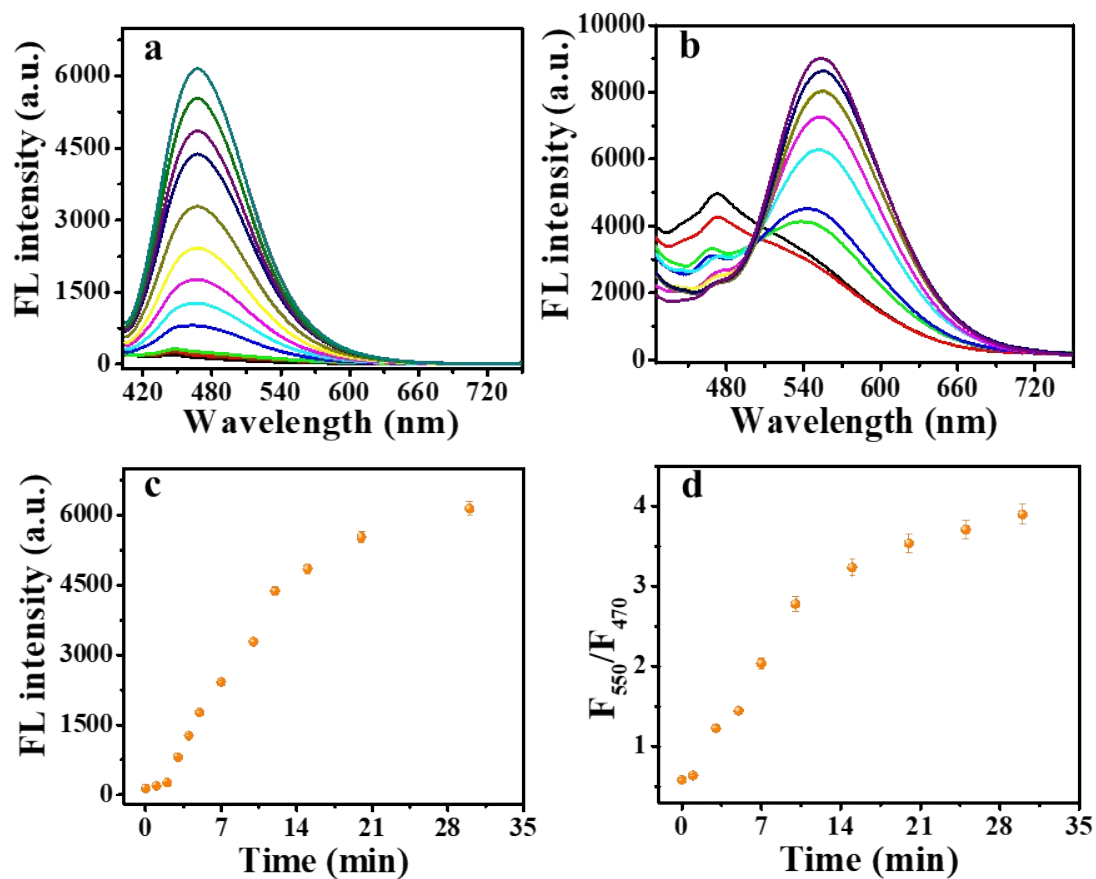

1

2 **Fig. S4.** Luminescence spectra of the LFC nanoparticles (a) and LFC nanoparticles -  
 3  $Mn^{2+}$  (b) at different times; (c) Variations in luminescence intensity with the change of  
 4 reaction time without  $Mn^{2+}$  (d) Variations in luminescence intensity with the change of  
 5 reaction time with  $Mn^{2+}$ ; [L-DOPA] = 100  $\mu$ M, [ $Mn^{2+}$ ] = [2  $\mu$ M].

6

7



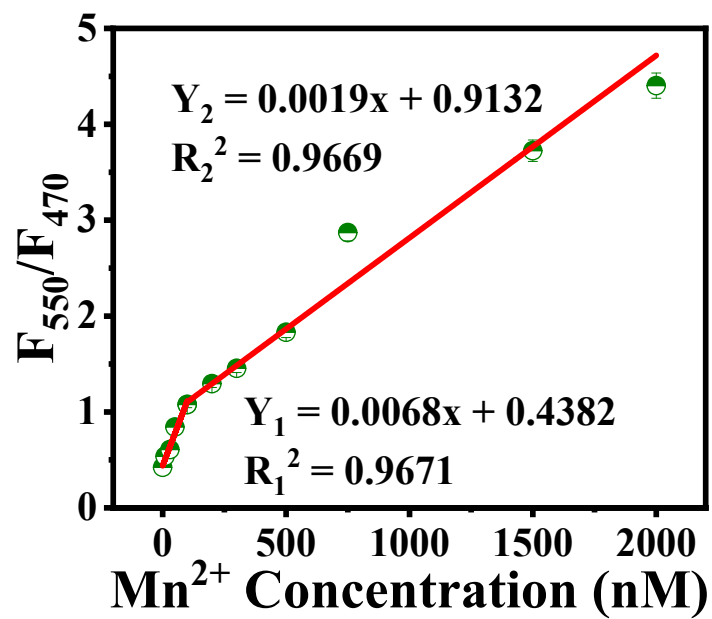

1

2 **Fig. S5.** The relationship between the fluorescent ratio ( $F_{550}/F_{470}$ ) and the amounts of

3  $Mn^{2+}$ .

4

5

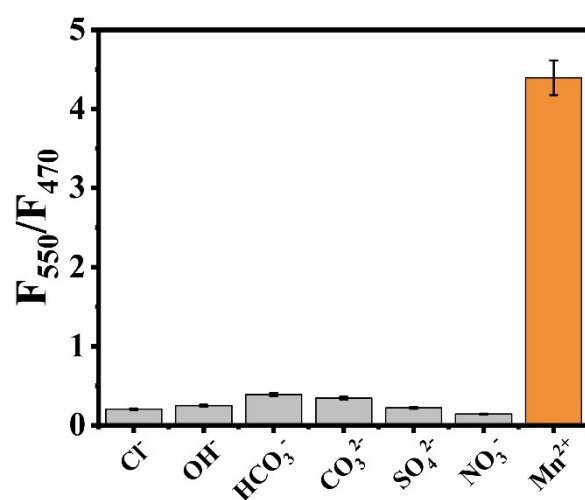

1

2 **Fig. S6.** Relative responses of the luminescence ratio of LFC at 550 nm and 470 nm to

3 different anions ([L-DOPA]=100  $\mu$ M, [Anion]=[2  $\mu$ M]).

4

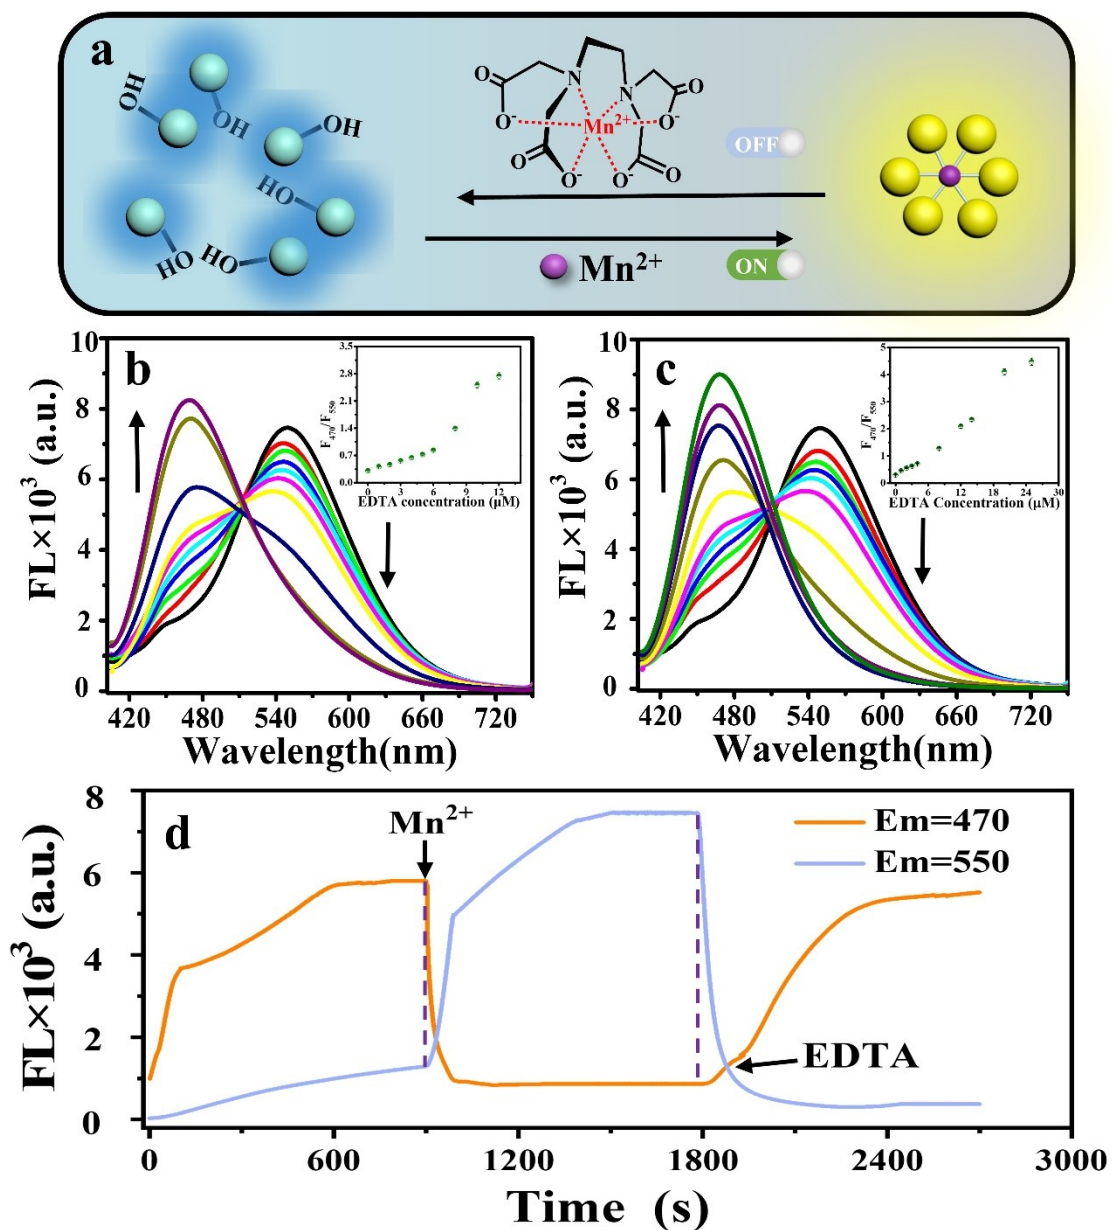

1

2 **Fig. S7.** (a) Scheme of the formation of Mn<sup>2+</sup>-induced LFC nanoparticles aggregates

3 by introducing Mn<sup>2+</sup> into LFC nanoparticles, and the property of luminescence

4 “On/Off” upon Mn<sup>2+</sup>/EDTA; (b) Luminescence spectra of the Mn<sup>2+</sup>-induced LFC

5 nanoparticles aggregates at different concentrations of EDTA based on the pre-mixing

6 strategy (c) Luminescence spectra of the Mn<sup>2+</sup>-induced LFC nanoparticles aggregates

7 at different concentrations of EDTA based on the post-mixing strategy; (d)

8 Luminescence spectra in different time.

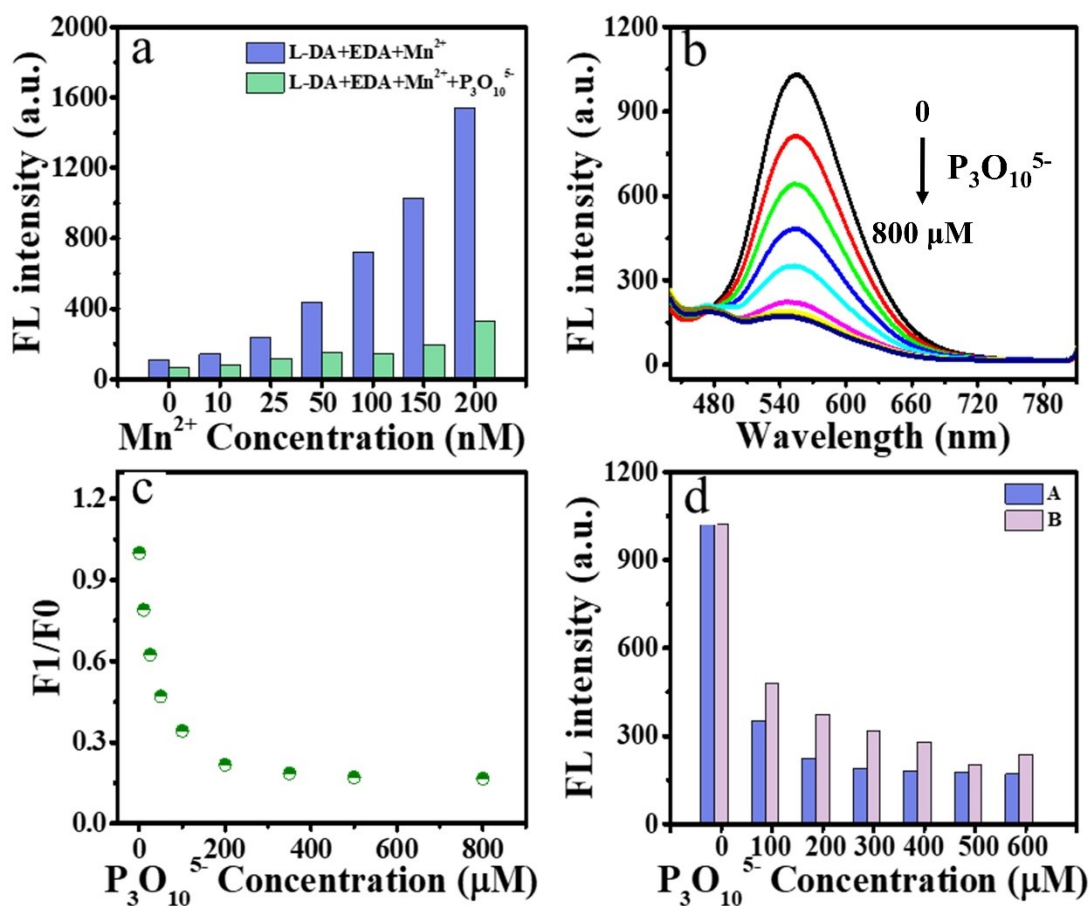

1  
 2 **Fig. S8.** (a) Luminescence histograms of the LFC nanoparticles at different  
 3 concentrations of  $Mn^{2+}$  (blue) at 500  $\mu M$   $P_3O_{10}^{5-}$  (green); luminescence spectra (b) and  
 4 F1/F0 (c) of the  $Mn^{2+}$ -induced LFC nanoparticles aggregates at different concentrations  
 5 of  $P_3O_{10}^{5-}$ ; (d) Luminescence histograms of the  $Mn^{2+}$ -induced LFC nanoparticles  
 6 aggregates and different concentration  $P_3O_{10}^{5-}$  incubated at 37  $^{\circ}C$  for 30 min at pH 7.4  
 7 (A) and pH 9 (B).

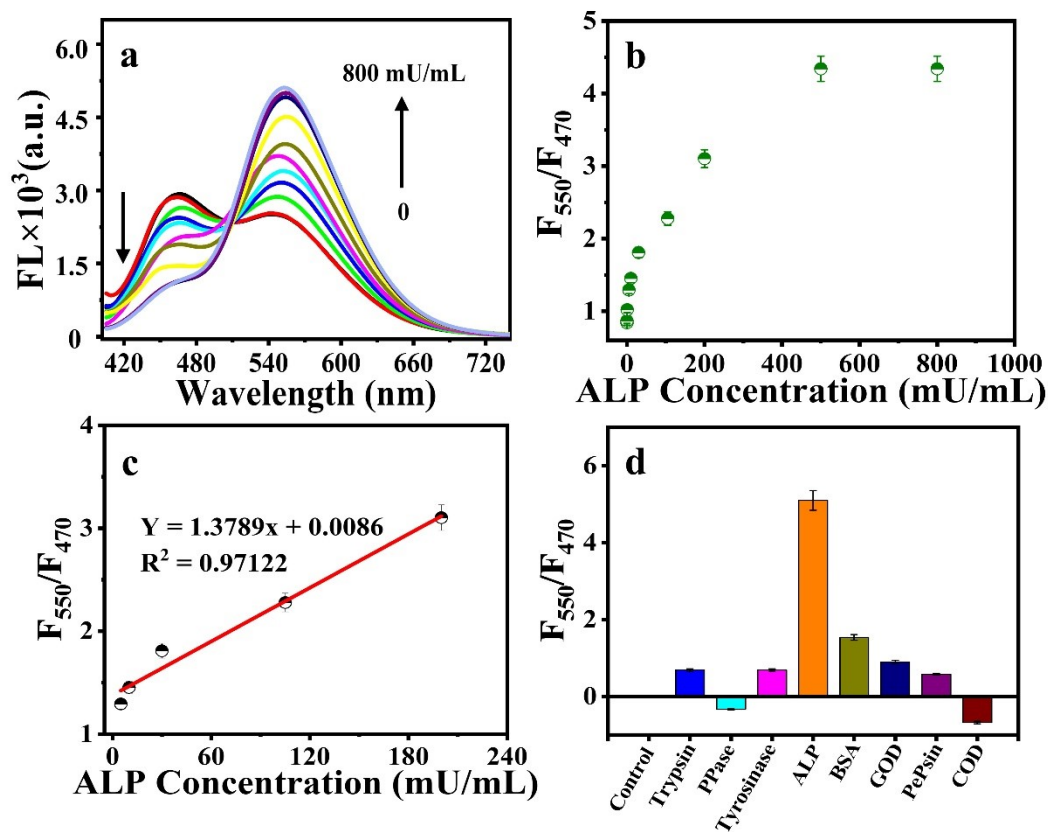

1

2 **Fig. S9.** (a) Luminescence spectra of the  $Mn^{2+}$ -LFC nanoparticles obtained after the  
 3 addition of 0-800 mU/mL ALP; (b) A plot of the  $1/(F_{470}/F_{550})$  value versus the ALP  
 4 concentration (c) Linear curve (ALP concentrations 5-200 mU/mL); (d) Luminescence  
 5 response of the proposed nanoimmunosensor to different kinds of proteins. The  
 6 concentrations of the proteins were all 200 mU/mL.

7

8

1 **3. Supplementary tables**

2

3 **Table S1** Comparison of ratiometric luminescence  $\text{Mn}^{2+}$  sensor with other  $\text{Mn}^{2+}$

4 sensors

| <b>Method</b>               | <b>Linear range</b>     | <b>Limit of detection</b> | <b>Ref</b> |
|-----------------------------|-------------------------|---------------------------|------------|
| fluorescence                | 1 - 22 mM               | 0.713 mM                  | [1]        |
| silver nanoparticles        | 50 - 200 $\mu\text{M}$  | 16 $\mu\text{M}$          | [2]        |
| colorimetric                | 5 - 70 $\mu\text{M}$    | 20 nM                     | [3]        |
| thermosensitive fluorescent | 0 - 55 $\mu\text{M}$    | 247 nM                    | [4]        |
| fluorescence                | 0.5 - 700 $\mu\text{M}$ | 0.45 $\mu\text{M}$        | [5]        |
| ratiometric luminescence    | 0 - 200 nM              | 3.33 nM                   | this work  |

5

6

1 **Table S2** Recoveries for the Detection of Mn<sup>2+</sup> in the Water Samples (n = 3)

| <b>Samples</b>         | <b>Spiked (nM)</b> | <b>Found (nM) mean<sup>a</sup>±SD<sup>b</sup></b> | <b>Recovery (%)</b> |
|------------------------|--------------------|---------------------------------------------------|---------------------|
|                        | 0                  | not detected                                      | not available       |
| Drinking pure<br>water | 40                 | 41.40±2.84                                        | 103.50              |
|                        | 80                 | 83.35±3.72                                        | 104.19              |
|                        | 120                | 115.44±5.04                                       | 96.20               |
| .....                  |                    |                                                   |                     |
|                        | 0                  | not detected                                      | not available       |
| Tap water              | 40                 | 38.21±1.99                                        | 95.53               |
|                        | 80                 | 77.27±4.03                                        | 96.59               |
|                        | 120                | 115.16±6.67                                       | 95.97               |
| .....                  |                    |                                                   |                     |
|                        | 0                  | not detected                                      | not available       |
| River water            | 40                 | 41.71±1.81                                        | 104.28              |
|                        | 80                 | 78.49±5.75                                        | 98.11               |
|                        | 120                | 123.65±4.83                                       | 103.04              |

**a Mean of three independent experiments. b Standard deviation.**

2

3

1 **Table S3** Recoveries for the Detection of ALP in the human serum at different  
 2 concentrations ( $n = 3$ )

| Serum concentration (%) | ALP Spiked (mU/mL) | Found (mU/mL)<br>mean <sup>a</sup> ±SD <sup>b</sup> | Recovery (%) |
|-------------------------|--------------------|-----------------------------------------------------|--------------|
| 1                       |                    | 50.56±1.78                                          | 101.12       |
| 2                       |                    | 50.37±1.36                                          | 100.70       |
| 3                       | 50                 | 49.13±1.14                                          | 98.27        |
| 5                       |                    | 53.68±3.59                                          | 107.40       |
| 10                      |                    | 61.41±4.51                                          | 122.80       |

**a Mean of three independent experiments. b Standard deviation.**

3

4



1 **Table S4** Recoveries for the Detection of ALP in the human serum ( $n = 3$ )

| Samples No | Spiked (mU/mL) | Found (mU/mL) mean <sup>a</sup> ±SD <sup>b</sup> | Recovery (%) |
|------------|----------------|--------------------------------------------------|--------------|
| 1          | 0              | 1.67±1.21                                        | -            |
| 2          | 5              | 4.93±0.36                                        | 98.56        |
| 3          | 10             | 10.11±1.54                                       | 101.10       |
| 4          | 15             | 14.93±1.59                                       | 99.53        |
| 5          | 20             | 19.14±0.97                                       | 95.70        |
| 6          | 50             | 50.56±2.78                                       | 101.12       |
| 7          | 100            | 103.12±3.56                                      | 103.12       |
| 8          | 200            | 197.38±4.51                                      | 98.69        |

**a Mean of three independent experiments. b Standard deviation.**

2

3

4

1 **Table S5** Comparison of ratiometric luminescence ALP assay with other ALP

2 analytical techniques

| <b>Method</b>            | <b>Sensing system</b>                    | <b>Linear range (mU/mL)</b> | <b>Limit of detection (mU/mL)</b> | <b>Time (min)</b> | <b>Ref</b> |
|--------------------------|------------------------------------------|-----------------------------|-----------------------------------|-------------------|------------|
| photothermal             | AAP-MnO <sub>2</sub> nanosheet           | 0.5 - 200                   | 0.1                               | 40                | [6]        |
| photoelectrochemical     | CsPbBr <sub>3</sub> /PbS heterojunctions | 0.5 - 40                    | 42.1                              | 30                | [7]        |
| fluorescence             | DNA/AgNCs                                | 30 - 240                    | 5                                 | 30                | [8]        |
| fluorescence probe       | TPEPy-pY                                 | 1 - 1000                    | 6.6                               | 60                | [9]        |
| test strips platform     | HRP-DNA paper                            | 1 - 20                      | 0.7                               | 23                | [10]       |
| ratiometric luminescence | CDs                                      | 1×10 <sup>-5</sup> -0.1     | 1×10 <sup>-5</sup>                | 40                | [11]       |
| ratiometric luminescence | MnO <sub>2</sub> -based RF               | 0.25 -14                    | 0.25                              | 30                | [12]       |
| ratiometric luminescence | LFC-Mn <sup>2+</sup>                     | 0 - 800                     | 1.67                              | 15                | this work  |

3

4

1 **Table S6** Comparison of ratiometric luminescence cTnI with other methods

| <b>Method</b>             | <b>Linear range</b> | <b>Limit of detection</b> | <b>Ref</b> |
|---------------------------|---------------------|---------------------------|------------|
| electrochemistry          | 0 - 24 ng/mL        | 1 ng/mL                   | [13]       |
| colorimetric              | 0.1 - 500 ng/mL     | 0.2 ng/mL                 | [14]       |
| lateral flow immunoassays | 1 - 1000 ng/mL      | 4 ng/mL                   | [15]       |
| fluorescence immunoassay  | 1 - 250 ng/mL       | 1 ng/mL                   | [16]       |
| paper-based fluorescence  | 1 - 50 ng/mL        | 1 ng/mL                   | [17]       |
| ratiometric luminescence  | 0.1-125 ng/mL       | 0.033 ng/mL               | this work  |

2

3

1 **Table S7** Analytical results for cTnI in the human serum samples (mean; n = 3). The  
 2 results of the normal adults (samples 1 and 2) and patients with AMI (samples 3, 4, 5  
 3 and 6) are obtained by the dilution for 0 and 20 times.

| Samples<br>No | This assay       |              | TMB-based standard ELISA method |              |
|---------------|------------------|--------------|---------------------------------|--------------|
|               | Detected (ng/mL) | RSD (%; n=3) | Detected (ng/mL)                | RSD (%; n=3) |
| 1             | 0.27             | 2.91         | 0.32                            | 1.94         |
| 2             | 0.39             | 4.79         | 0.41                            | 2.97         |
| 3             | 6.52             | 2.18         | 8.91                            | 3.17         |
| 4             | 21.0             | 1.25         | 22.4                            | 2.76         |
| 5             | 59.2             | 7.34         | 61.6                            | 6.29         |
| 6             | 94.3             | 3.63         | 97.0                            | 3.91         |

4  
5

## 1 References

- 2 [1] Y. Wang, X. Wang, K. Zhang, X. Wang, X. Xin, W. Fan, F. Dai, Y. Han and D.  
3 Sun, *Dalton Trans.*, 2019, **48**, 2569-2573.
- 4 [2] M. Jarczewska, M. Borowska, M. Olszewski and E. Malinowska, *Talanta*, 2024,  
5 **273**, 125926.
- 6 [3] W. Ngeontae, K. Chaiendoo, K. Ngamdee, S. Ruangchai, C. Saiyasombat, W.  
7 Busayaporn, S. Ittisanronnachai and V. Promarak, *Dyes Pigm.*, 2022, **203**, 110325.
- 8 [4] S. Dong, W. Ji, Z. Ma, Z. Zhu, N. Ding, J. Nie and B. Du, *ACS Appl. Polym.*  
9 *Mater.*, 2020, **2**, 3621-3631.
- 10 [5] S. Xie, B. Xu, R. Tang, S. Chen, C. Lei and Z. Nie, *Anal. Chem.*, 2022, **94**, 10159-  
11 10167.
- 12 [6] X. Liu, L. Zou, X. Yang, Q. Wang, Y. Zheng, X. Geng, G. Liao, W. Nie and K.  
13 Wang, *Anal. Chem.*, 2019, **91**, 7943-7949.
- 14 [7] L. Deng, F. Ma, M. Yang, X. Li and X. Chen, *Chem. Commun.*, 2023, **59**, 1361-  
15 1364.
- 16 [8] J.-L. Ma, B.-C. Yin, X. Wu and B.C. Ye, *Anal. Chem.*, 2016, **88**, 9219-9225.
- 17 [9] X. Zhang, C. Ren, F. Hu, Y. Gao, Z. Wang, H. Li, J. Liu, B. Liu and C. Yang,  
18 *Anal. Chem.*, 2020, **92**, 5185-5190.
- 19 [10] Y. Chang, Q. Zhang, W. Xue, Y. Wu, Y. Liu and M. Liu, *Chem. Commun.*, 2023,  
20 **59**, 3399-3402.
- 21 [11] S.Q. Lin, B.Z. Jia, W. Luo, H. Wang, H.T. Lei, W.F. Zhang, Z.L. Xu and L. Luo,  
22 *Food Chem.*, 2023, **426**, 136582.
- 23 [12] H.W. Liang, B.Z. Jia, W.F. Zhang, X.X. Wang, K. Zhou, H.T. Lei, Z.L. Xu and L.

- 1 Luo, *J. Agric. Food Chem.*, 2023, **71**, 7575-7583.
- 2 [13] I. Sarangadharan, S.L. Wang, R. Sukesan, P.C. Chen, T.Y. Dai, A. K.  
3 Pulikkathodi, C.P. Hsu, H.H. K. Chiang, L.Y.M. Liu and Y.L. Wang, *Anal. Chem.*,  
4 2018, **90**, 2867-2874.
- 5 [14] S. Kakkar, S. Chauhan, R. Bala, Bharti, V. Kumar, M. Rohit and V. Bhalla,  
6 *Microchim. Acta.*, 2022, **189**, 366.
- 7 [15] E. Hemmig, Y. Temiz, O. Gokçe, R. D. Lovchik and E. Delamarche, *Anal.*  
8 *Chem.*, 2019, **92**, 940-946.
- 9 [16] G. Liu, J. Zhao, S. Wang, S. Lu, J. Sun and X. Yang, *Sensor. Actuat. B: Chem.*,  
10 2020, **306**, 127583.
- 11 [17] X. Guo, L. Zong, Y. Jiao, Y. Han, X. Zhang, J. Xu, L. Li, C.W. Zhang, Z. Liu, Q.  
12 Ju, J. Liu, Z. Xu, H.D. Yu and W. Huang, *Anal. Chem.*, 2019, **91**, 9300-9307.  
13  
14
